# Supplementary material for: Biodegradable multi-blocked polyurethane micelles for intracellular drug delivery: the effect of disulfide location on the drug release profile
Source: Royal Society of Chemistry journal article supplement (doi:10.1039/c5ra24903a), 2016-01-01
Supplement: c5ra24903a2.pdf [file c5ra24903a2.pdf]

## Biodegradable multi-blocked polyurethane micelles for intracellular drug delivery: the effect of disulfide location on the drug release profile

### Electronic Supplementary Information

Yongchao Yao<sup>†a</sup>, He Xu<sup>†b</sup>, Chang Liu<sup>a</sup>, Yayuan Guan<sup>a</sup>, Deqiu Xu<sup>a</sup>, Jiya Zhang<sup>a</sup>, Yuling Su<sup>a</sup>, Lili Zhao<sup>a</sup> and Jianbin Luo<sup>\*a</sup>

<sup>a</sup> College of Chemistry and Environmental Protection Engineering, Southwest University for Nationalities, 610041 Sichuan, China. *E-mail: luojb1971@163.com*

<sup>b</sup> Department of Immunology, West China School of Preclinical and Forensic Medicine, Sichuan University

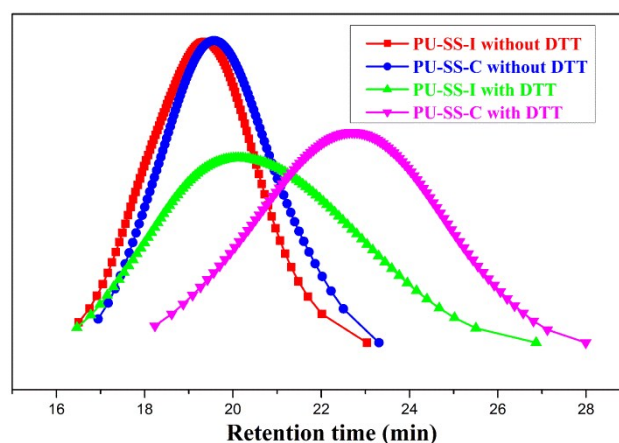

Fig. S1 GPC curves of purified PU-SS-C and PU-SS-I

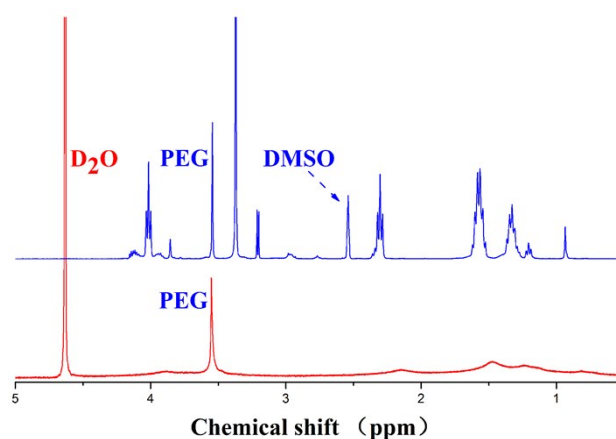

**Fig.S2**  $^1\text{H}$  NMR spectra of reduction-sensitive polyurethane (PU-SS-I) in DMSO- $d_6$  and its micelles in  $\text{D}_2\text{O}$

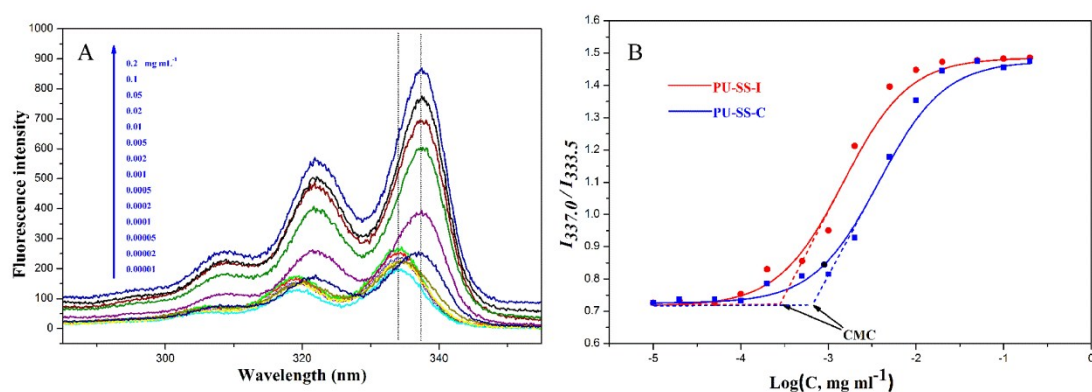

**Fig. S3** (A) Typical fluorescence excitation spectra ( $\lambda_{\text{em}}=372$  nm) of reduction-sensitive polyurethane micelles. (B)  $I_{337.0}/I_{333.5}$  ratios in the excitation spectra as a function of micellar concentrations (Log C). The CMCs are obtained from the intersection of the two tangent lines shown by the arrows.

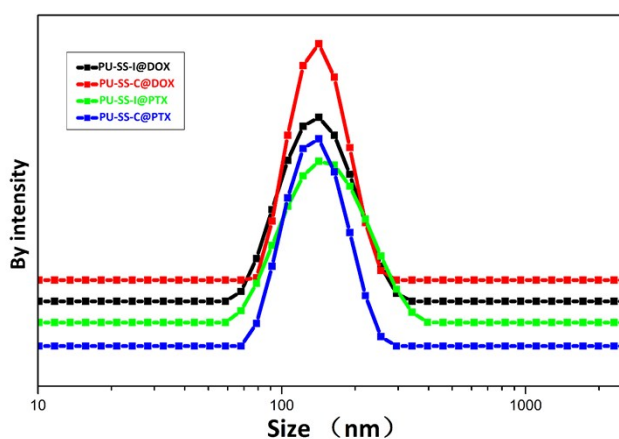

**Fig. S4** Size distribution of reduction-sensitive polyurethanes determined by DLS

**Table S1.** Composition and characteristics of reduction-sensitive polyurethanes and their micelles

| Samples | Feed ratio (mmol) |     |      |     |      |     | Molecular weights (g/mol) |                      |                                                | Size(nm)   | PDI       | Zeta potential (mv) |
|---------|-------------------|-----|------|-----|------|-----|---------------------------|----------------------|------------------------------------------------|------------|-----------|---------------------|
|         | PCL               | PEG | LDI  | Cys | LDI  | PEG | <i>M<sub>n</sub></i>      | <i>M<sub>w</sub></i> | <i>M<sub>n</sub></i> /<br><i>M<sub>w</sub></i> |            |           |                     |
| PU-SS-I | 3.2               |     | 3.87 | 1   | 1.13 | 0.8 | 24121                     | 40748                | 1.69                                           | 132.0 ±1.1 | 0.12±0.01 | -20.7±1.56          |
| PU-SS-C | 3.2               | 0.8 | 5    | 1   |      |     | 19150                     | 31586                | 1.65                                           | 137.2±1.9  | 0.14±0.02 | -7.2±0.89           |

**Table S2.** Elemental analysis results of PU-SS-I and PU-SS-C

| Sample  | N (%) | C (%) | H (%) | S (%) |
|---------|-------|-------|-------|-------|
| PU-SS-I | 3.00  | 61.79 | 8.70  | 0.526 |
| PU-SS-C | 3.22  | 61.11 | 8.67  | 0.481 |
